# Supplementary material for: The anti-aging effect of vitamin D and vitamin D receptor in Drosophila midgut
Source: publisher site journal article supplement (doi:10.18632/aging.205518), 2024-02-07
Supplement: Supplementary file [file aging-v16i3-205518-supplementary-material-SD1.pdf]

## SUPPLEMENTARY FIGURES

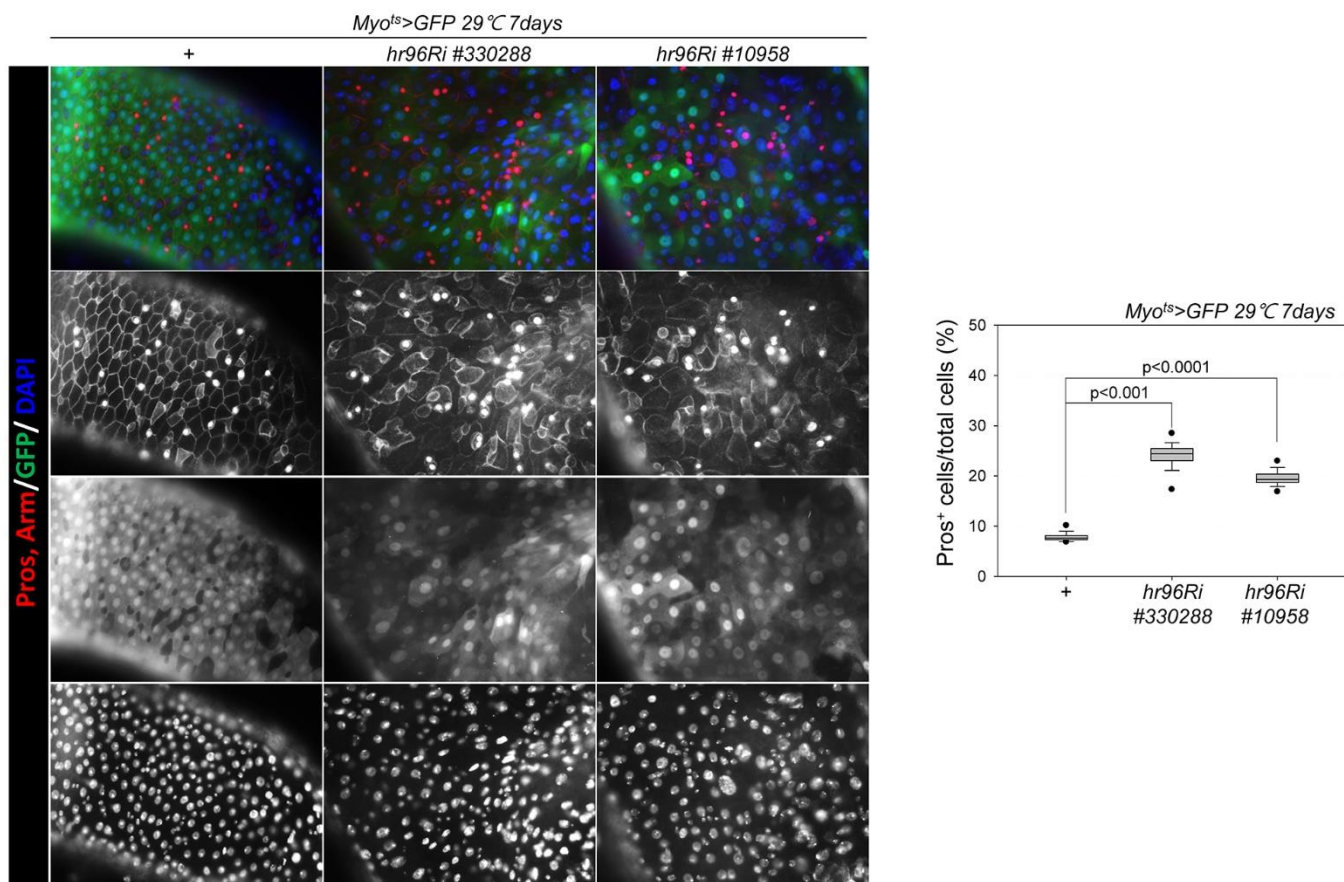

**Supplementary Figure 1. EC-specific VDR knockdown increases the number of Pros<sup>+</sup> cells.** Flies carrying the *Myo<sup>ts</sup>>GFP*, *Myo<sup>ts</sup>>GFP+VDRRi #330288*, *Myo<sup>ts</sup>>GFP+VDRRi #10958* genotypes were cultured at 29° C for 7 days. The guts of flies were dissected and labeled with anti-GFP (green), anti-Pros (red), and anti-Arm (red) antibodies and DAPI (blue). Original magnification is 200×. Frequency of Pros<sup>+</sup> cell per total cells. Three-day-old females were shifted to 29° C for 7 days and dissected guts were immunostained with anti-GFP (green), anti-Pros (red), and anti-Arm (red) antibodies and DAPI (blue). The Pros<sup>+</sup> cell numbers were counted in the total cells of these guts. Data (mean ± standard error) in the *Myo<sup>ts</sup>>GFP*, *Myo<sup>ts</sup>>GFP+VDRRi #330288*, *Myo<sup>ts</sup>>GFP+VDRRi #10958* flies were collated from 5533, 3645, and 4075 total cells of 19, 17, and 18 guts, respectively. *P*-values were calculated using the Student's *t*-test. *P* < 0.0001 and *p* < 0.001 compared to that of the *Myo<sup>ts</sup>>GFP* flies.

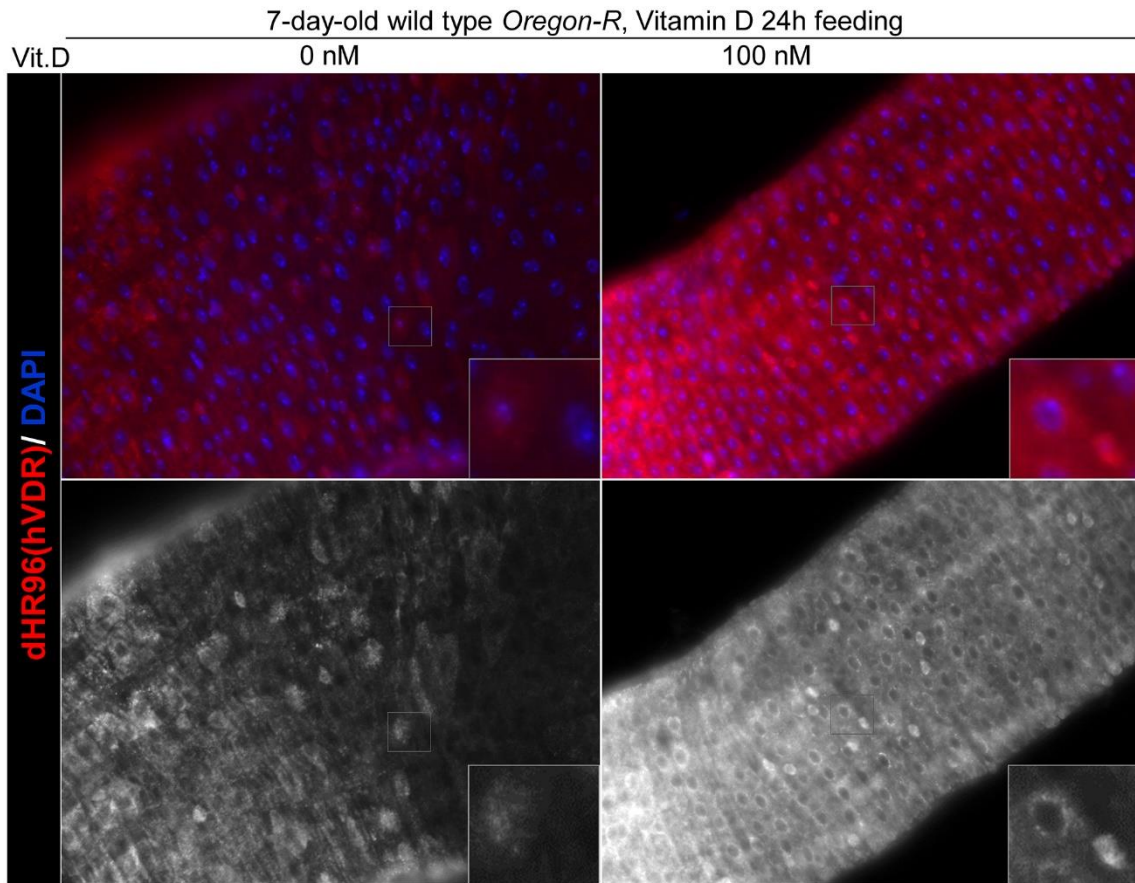

**Supplementary Figure 2. Effect of VitD on VDR localization in *Drosophila* intestine.** Gut from 3-day-old wild-type female flies without (0 nM) or with (100 nM) active VitD (1 $\alpha$ ,25-Dihydroxyvitamin D<sub>3</sub>) feeding for seven 24 h, were stained with anti-hVDR antibody (red) and DAPI (blue). Original magnification is 200 $\times$ . Gray squares in panels indicate magnified regions below.

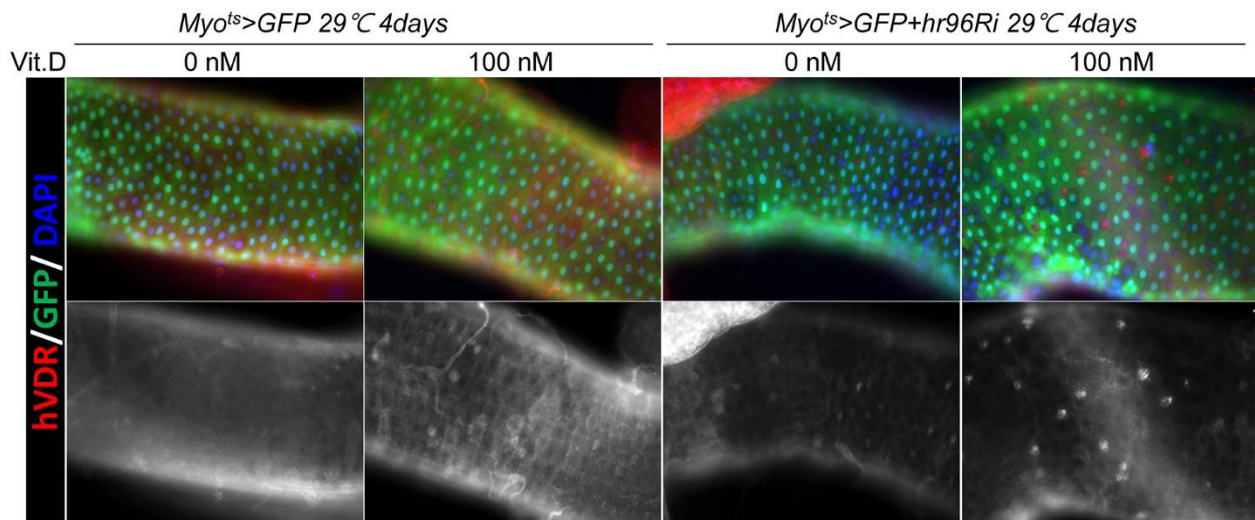

**Supplementary Figure 3. Hr96 acts as VDR during VitD feeding in *Drosophila* intestine.** Guts from 3-day-old *Myo<sup>ts</sup>>GFP* and *Myo<sup>ts</sup>>GFP+VDRRi* flies, without or with 100 nM VitD feeding at 29 $^{\circ}$  C for 4 days, were stained with anti-hVDR (red), anti-GFP (green), and DAPI (blue). Original magnification is 400 $\times$ .

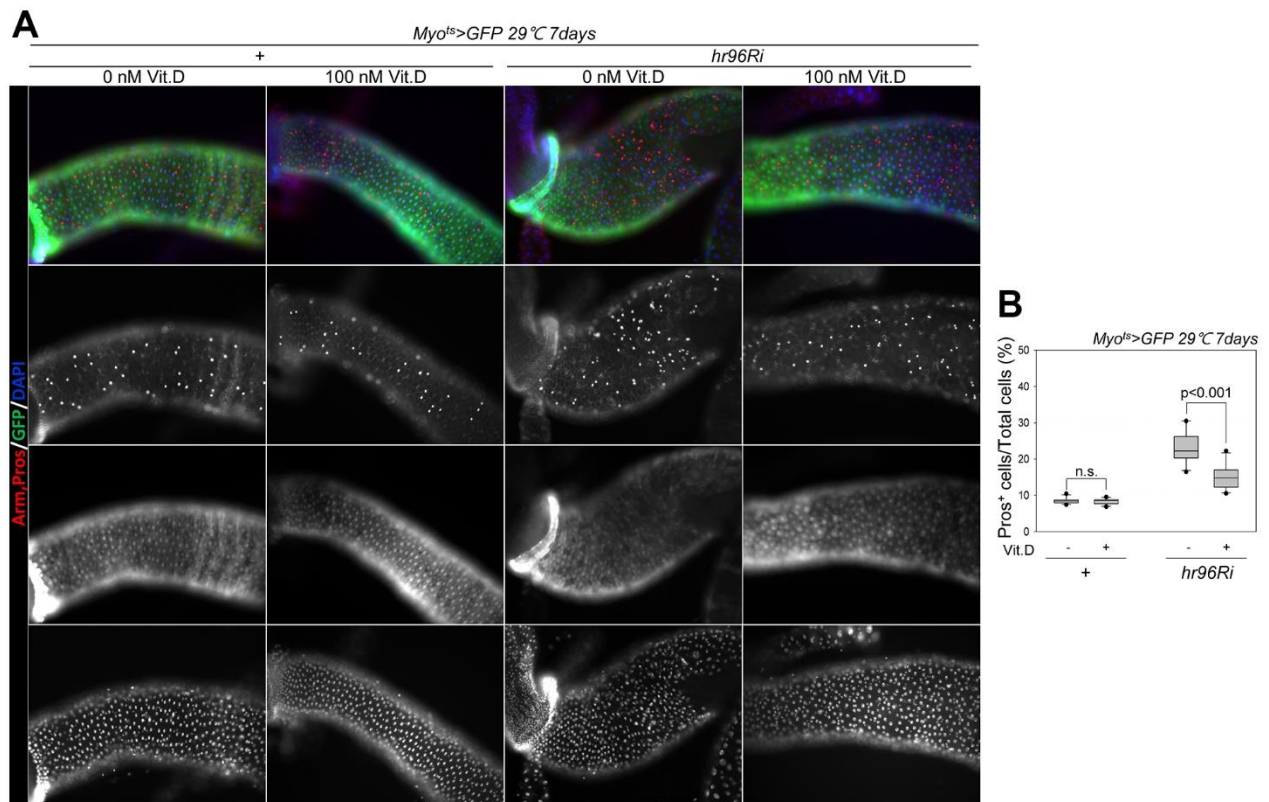

**Supplementary Figure 4. EC-specific VDR knockdown-induced increase of EE cell number reduced by VitD.** (A) Guts from 3-day-old *Myo<sup>ts</sup>>GFP* and *Myo<sup>ts</sup>>GFP+VDRRi* flies, without or with 100 nM VitD feeding at 29° C for 7 days, were stained with anti-Pros (red), anti-Arm (red), anti-GFP (green), and DAPI (blue). Original magnification is 400×. (B) Frequency of Pros<sup>+</sup> cells per total cells. Three-day-old females were shifted to 29° C for 7 days, and dissected guts were immunostained with anti-Pros (red), anti-Arm (red), anti-GFP (green), and DAPI (blue). The Pros<sup>+</sup> cell numbers were recorded with respect to the total cells of these guts. Data (mean ± standard error) in 10-day-old *Myo<sup>ts</sup>>GFP* and *Myo<sup>ts</sup>>GFP+VDRRi* flies without VitD feeding were collated from 4688 and 5050 total cells of 12 and 13 guts, respectively. Data (mean ± standard error) in 10-day-old *Myo<sup>ts</sup>>GFP* and *Myo<sup>ts</sup>>GFP+VDRRi* flies with VitD feeding were collated from 5036 and 4768 mitotic cells of 12 and 12 guts, respectively. n.s., indicates not significant ( $p > 0.05$ ).  $P$ -values were calculated using the Student's  $t$ -test.  $P < 0.001$  compared to that of the *Myo<sup>ts</sup>>GFP+VDRRi* flies without VitD.

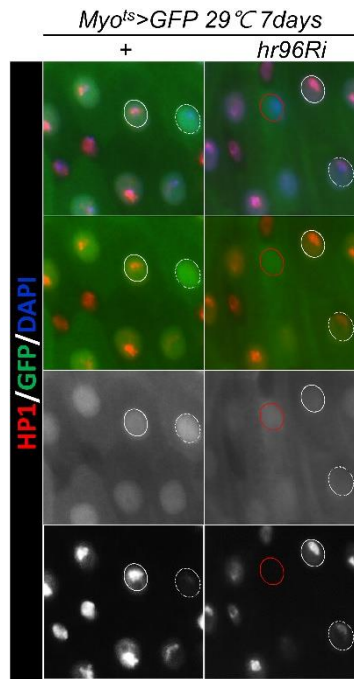

**Supplementary Figure 5. EC-specific VDR knockdown causes the loss of heterochromatin marker (HP1) in *Drosophila* intestinal enterocytes.** Flies carrying the *Myo<sup>ts</sup>>GFP* and *Myo<sup>ts</sup>>GFP+VDRRi* genotypes were cultured at 29° C for 7 days. The guts of flies were dissected and labeled with anti-GFP (green) and anti-HP1 (red) antibodies and DAPI (blue). Circles indicate nuclei of ECs (GFP<sup>+</sup> cells). White circle, condensed pattern of HP1; White dashed circle, dispersed and weak pattern of HP1; Red circle, loss of HP1. Original magnification is 200×.

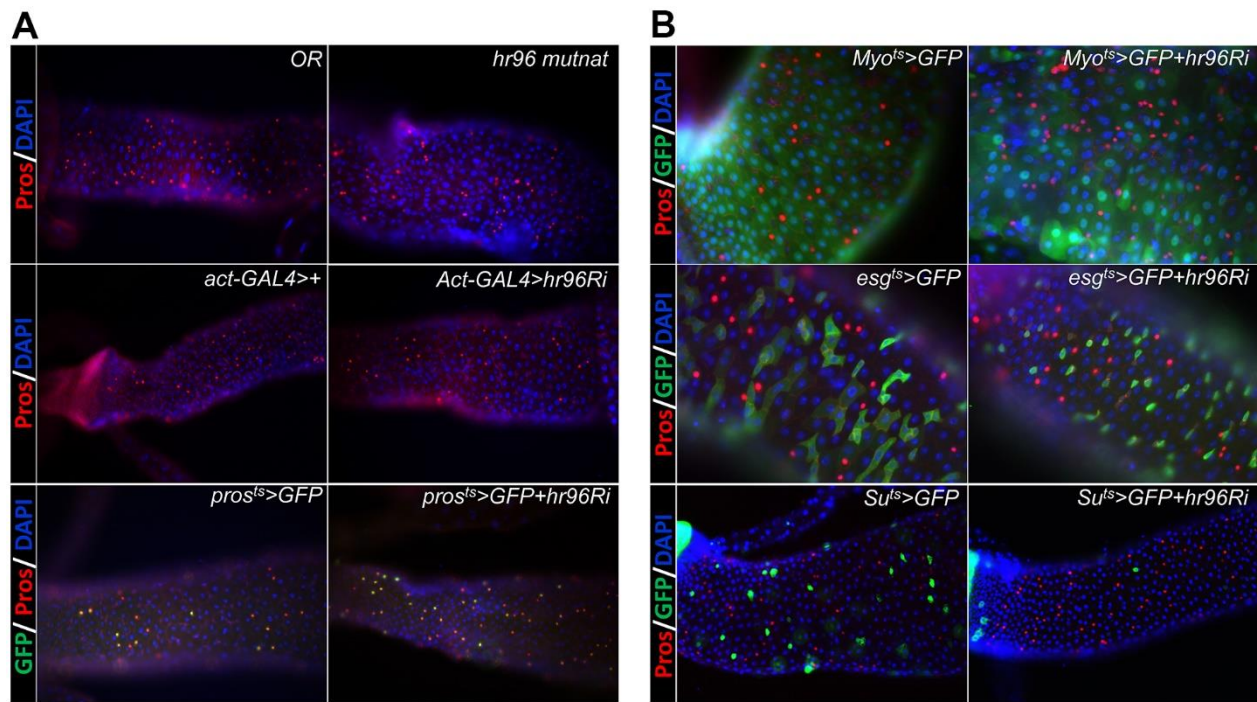

**Supplementary Figure 6. Intestinal cell type-specific differential effect of VDR on the number of Pros<sup>+</sup> cells.** (A) Wild-type, *hr96* mutant female, and flies carrying the *act-GAL4>+*, *act-GAL4>VDRRi*, *pros<sup>ts</sup>>GFP*, and *pros<sup>ts</sup>>GFP+VDRRi* genotypes were cultured at 29° C for 7 days. (B) Flies carrying the *Myo<sup>ts</sup>>GFP*, *Myo<sup>ts</sup>>GFP+VDRRi*, *esg<sup>ts</sup>>GFP*, *esg<sup>ts</sup>>GFP+VDRRi*, *Su<sup>ts</sup>>GFP*, or *Su<sup>ts</sup>>GFP+VDRRi* genotypes were cultured at 29° C for 7 days. The guts of flies were dissected and labeled with anti-GFP (green), and anti-Pros (red), and anti-Arm (red) antibodies and DAPI (blue). Original magnification is 400x.

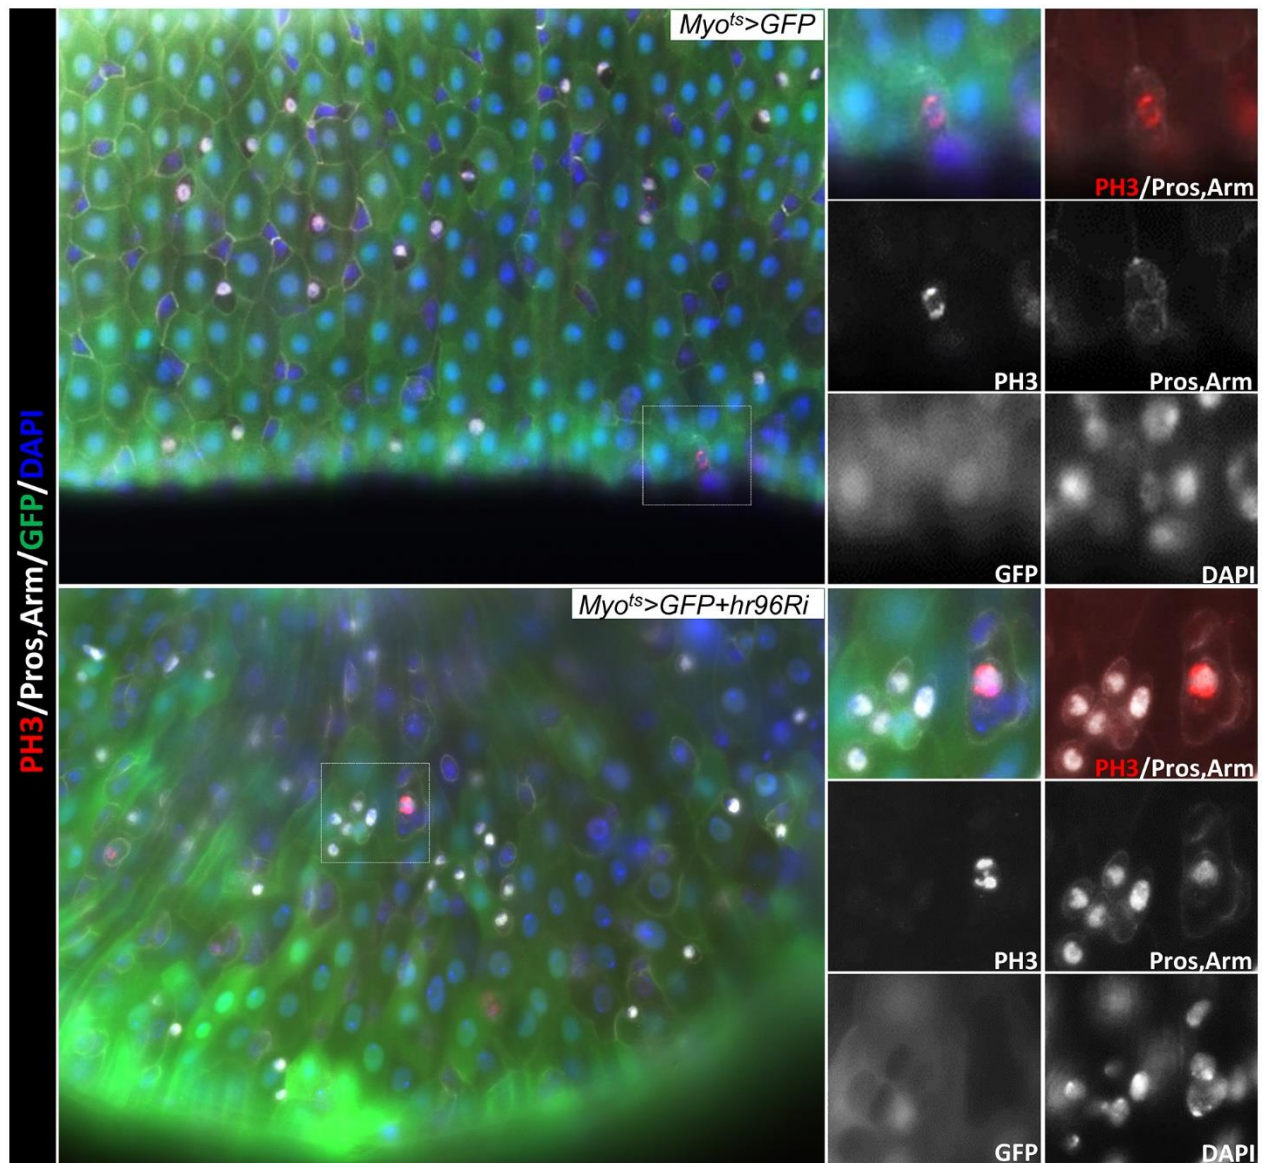

**Supplementary Figure 7. EC-specific knockdown of VDR results in dividing EE cell formation.** Flies carrying the *Myo<sup>ts</sup>>GFP* and *Myo<sup>ts</sup>>GFP+VDRRi* genotypes were cultured at 29° C for 7 days. The guts of flies were dissected and labeled with anti-GFP (green), anti-Pros (white), anti-Arm (white), and anti-PH3 (red) antibodies and DAPI (blue). Gray squares in panels indicate magnified regions. Original magnification is 200×.
